# Supplementary material
Source: PubMed Central journal article supplement (PMC9233018)
Supplement: NIHMS1799045-supplement-1.pdf [file NIHMS1799045-supplement-1.pdf]

**A**

Daily tamoxifen IP injection for 5 consecutive days

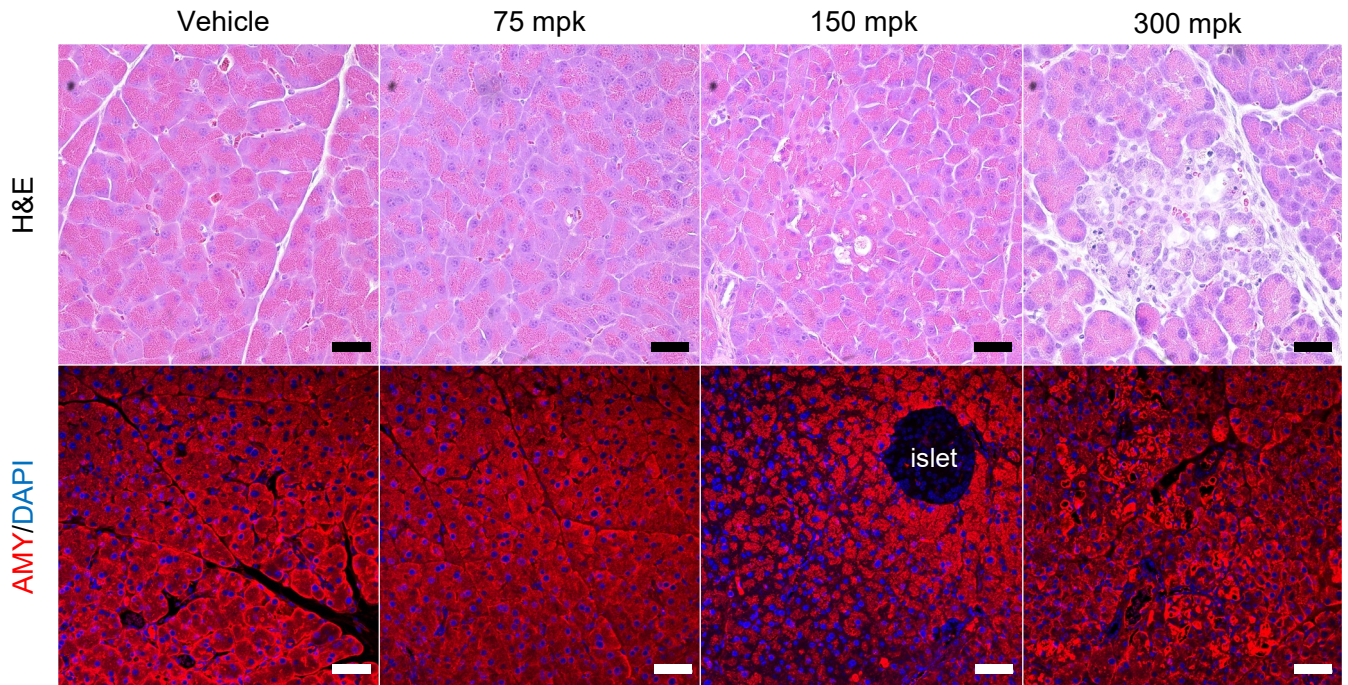**B**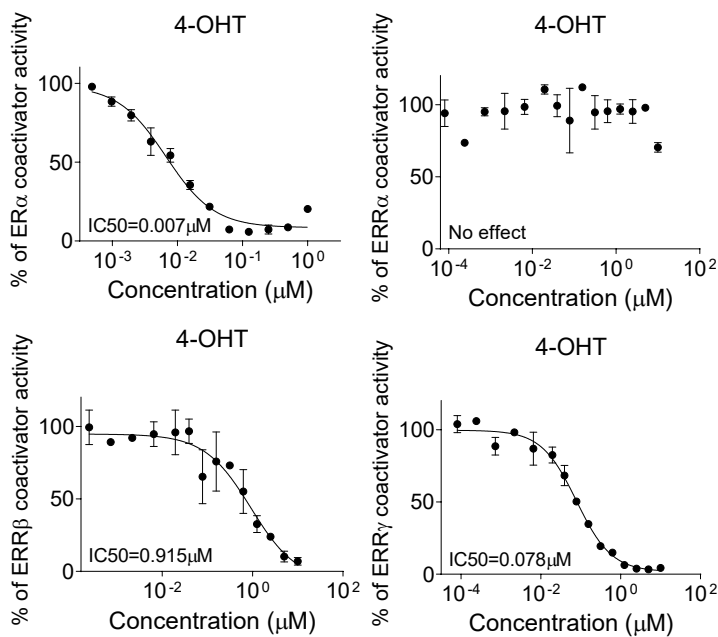**C**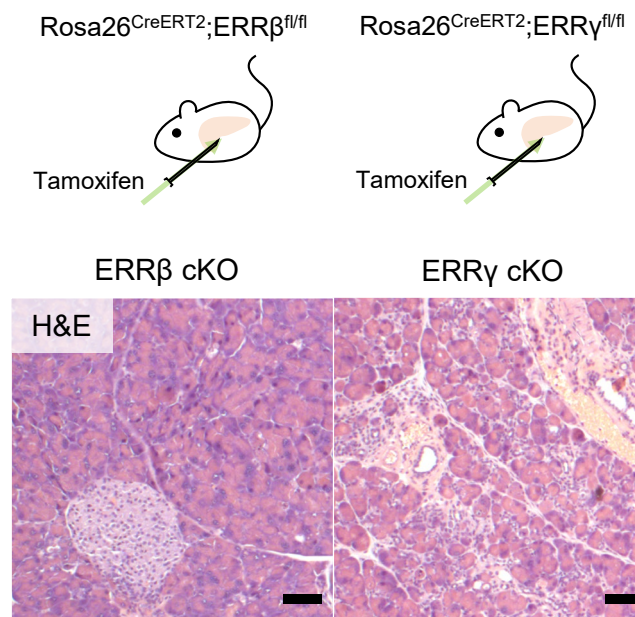

### Supplementary Figure 1. Tamoxifen induces exocrine pancreas damage in a dose-dependent manner and inhibits ERR $\gamma$ -coactivator.

(A) H&E and immunofluorescence images from pancreas tissue. TAM was intraperitoneally injected daily for 5 consecutive days at the indicated dose. mpk, mg TAM/ kg body weight; AMY, amylase; DAPI, nucleus. Scale bar, 50  $\mu$ m. (B) 4-OHT, 4-hydroxytamoxifen, binding assay for ERRs and ER $\alpha$  was performed using Lanthascreen assay system (Life Technologies, Grand Island, NY, USA), which was based on TR-FRET, following manufacturer's instruction. The binding activity in the presence of compounds was represented as the percentage of control binding activity, and the IC<sub>50</sub> value was calculated with non-linear regression fit with four parameters using the Prism 8.3 software. All IC<sub>50</sub> values were statistically evaluated by R-squared value of goodness-of-fit, which was over 0.9. (C) R26-CreERT2; ERR $\beta^{fl/fl}$  and R26-CreERT2; ERR $\gamma^{fl/fl}$  mice were generated. H&E images of pancreas tissue from mice at 1 d after the final TAM injection. Scale bar, 50  $\mu$ m. All data are presented as mean  $\pm$  SEM.

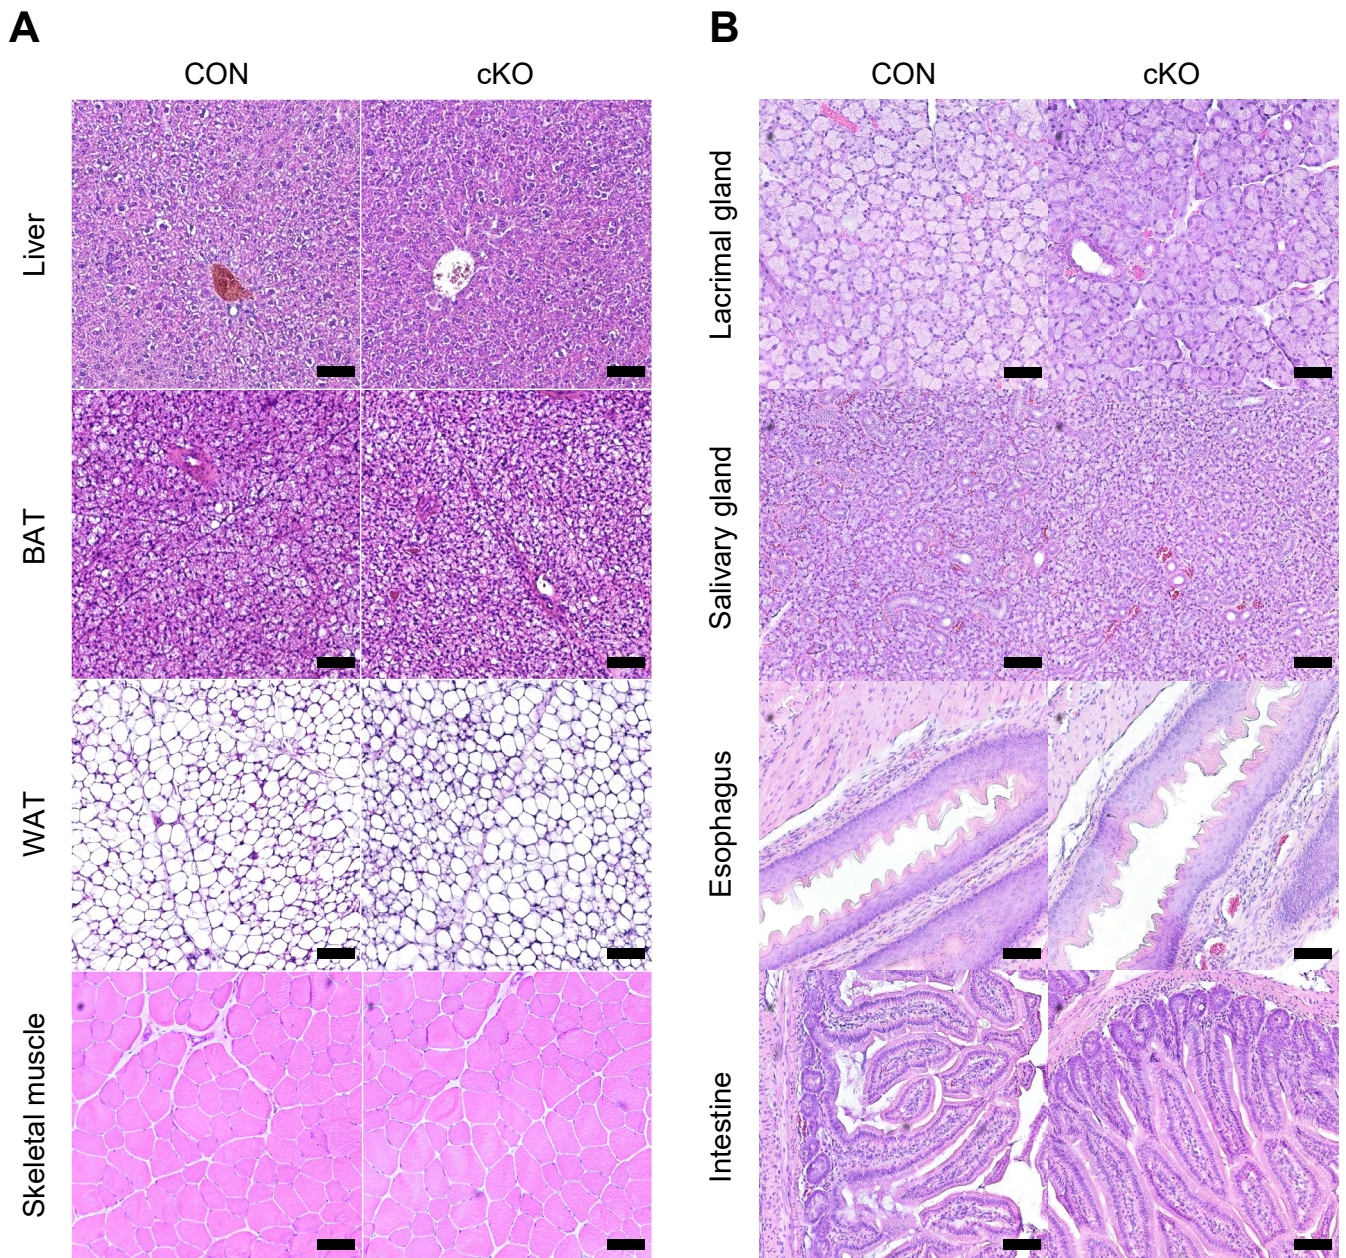

**Supplementary Figure 2. ERR $\gamma$  cKO mice do not display apparent phenotypes in non-pancreatic tissues.**

(A) H&E staining from metabolic tissues including liver, brown adipose tissue (BAT) and white adipose tissue (WAT) and skeletal muscle. (B) H&E staining from various glands including lacrimal gland, salivary gland, esophagus, and intestine. Tissues were obtained from male control (CON) and ERR $\gamma$  cKO (cKO) mice at d 7 after the final TAM injection. Scale bar, 50  $\mu$ m.

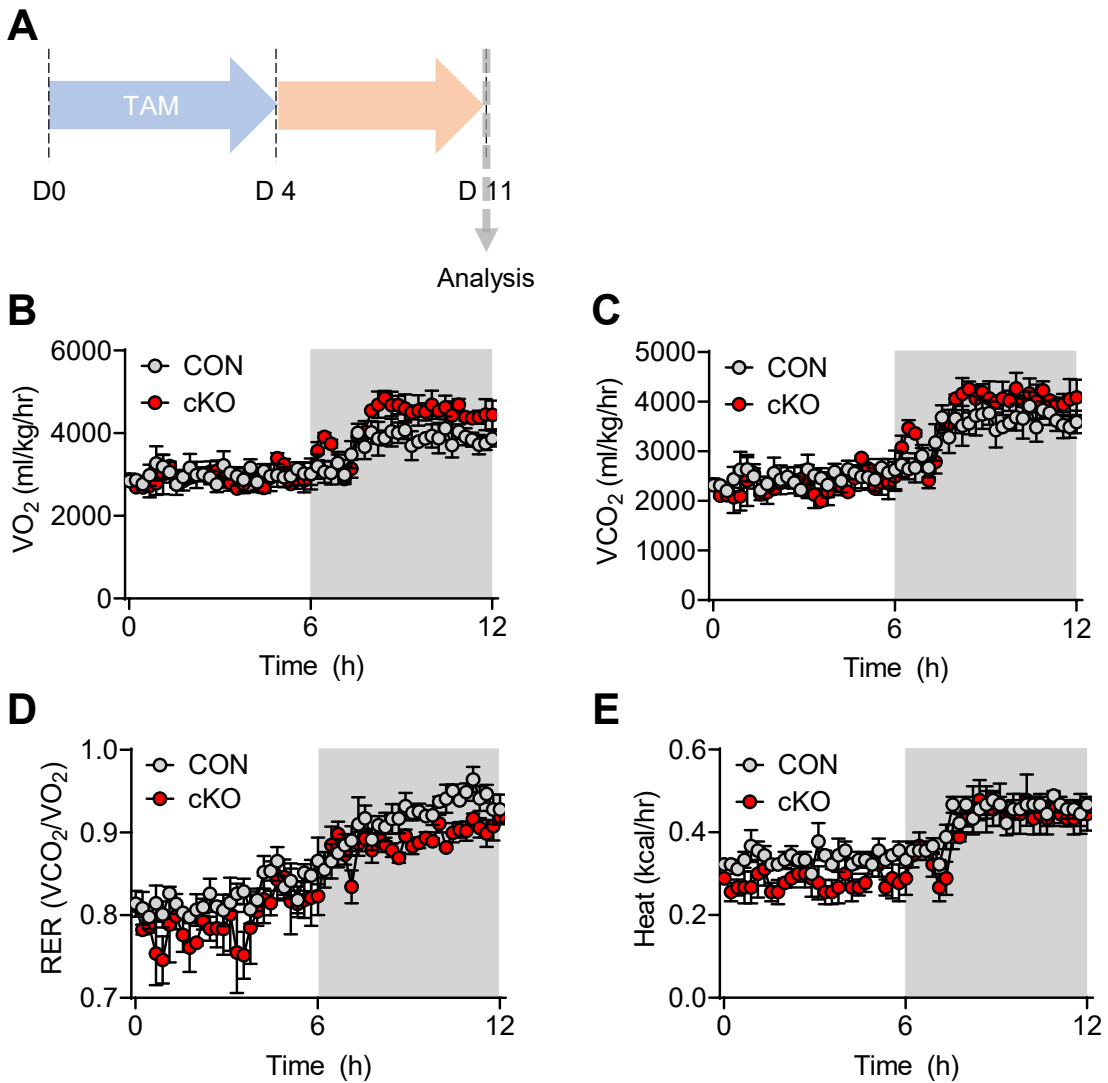

**Supplementary Figure 3. ERR $\gamma$  cKO mice do not display alterations in energy expenditure and respiratory exchange ratio.**

(A) Scheme of experimental design. Mice were intraperitoneally injected with tamoxifen (75 mg/kg) once daily for 5 consecutive days (d 0 ~ d 4) and then housed in metabolic chambers for 72 h at d 11. (B-E) Measurement of (B) oxygen consumption ( $VO_2$ ), (C) carbon dioxide production ( $VCO_2$ ), (C) respiratory exchange ratio (RER), and (D) heat production in control during light (no shade) and dark (gray shade) cycles. CON, control (n = 3, male); cKO, ERR $\gamma$  cKO (n = 3, male). All data presented as mean  $\pm$  SEM.

**A**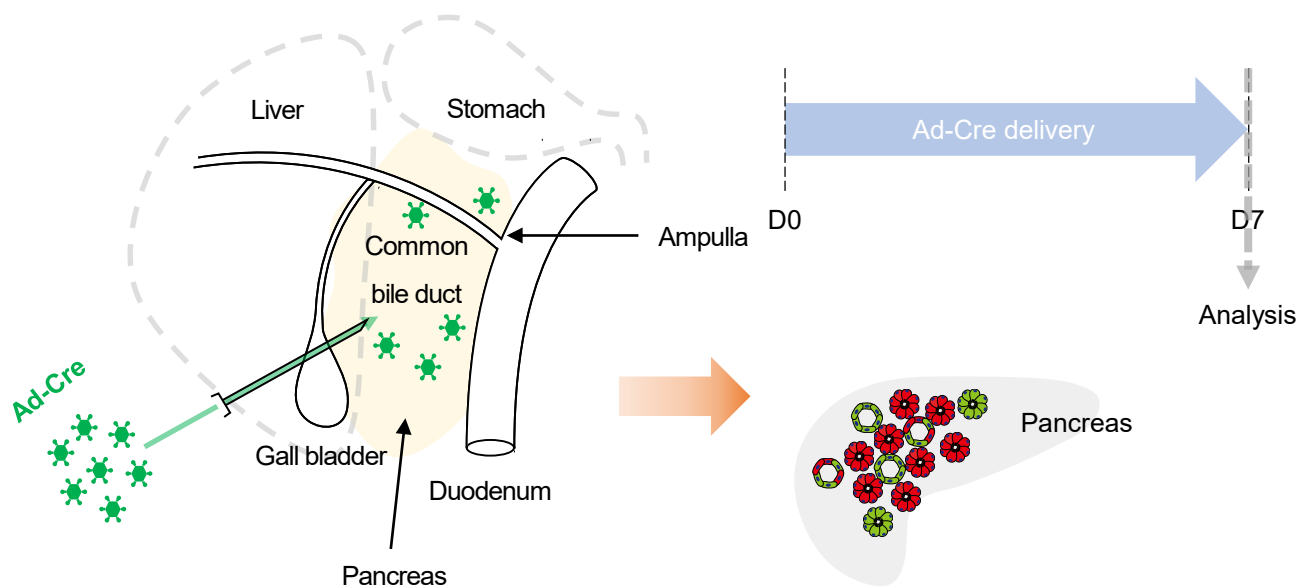**B**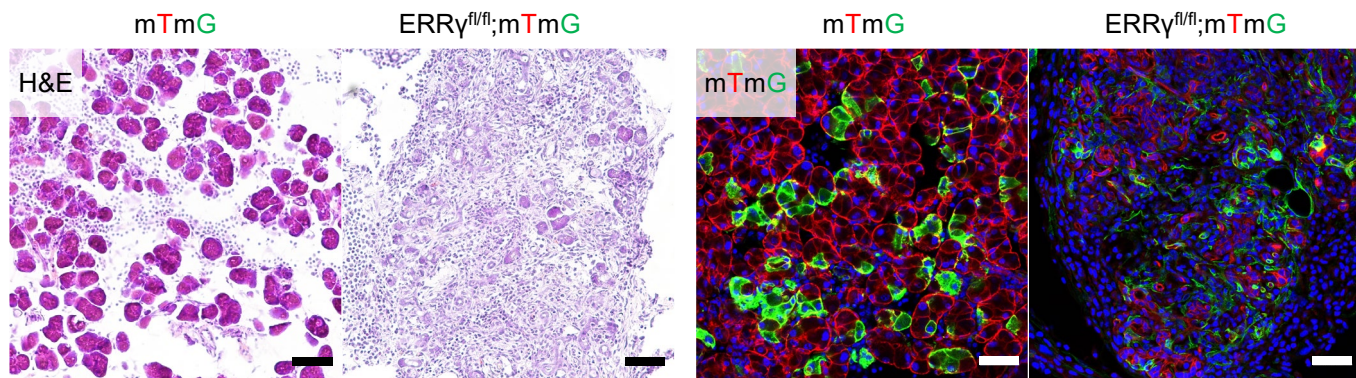

**Supplementary Figure 4. Local  $ERR\gamma$  deletion in the pancreas is sufficient to induce pancreatic degeneration.**

(A) Scheme of experimental design. Pancreatic parenchyma of control (*mTmG*) and *ERR $\gamma$ <sup>fl/fl</sup>; mTmG* mice were injected with adenovirus expressing Cre recombinase (Ad-Cre). In the *mTmG* reporter mice, all cells express membrane-targeted tdTomato (mT) prior to Cre expression, whereas the Cre-expressing cells express membrane-targeted GFP (mG). Mice were analyzed 7 d after Ad-CRE injection. (B) H&E staining (left panel) and fluorescence images (right panel) from frozen pancreas sections. Green fluorescence indicates Ad-Cre-mediated recombination. Scale bar, 50  $\mu$ m.

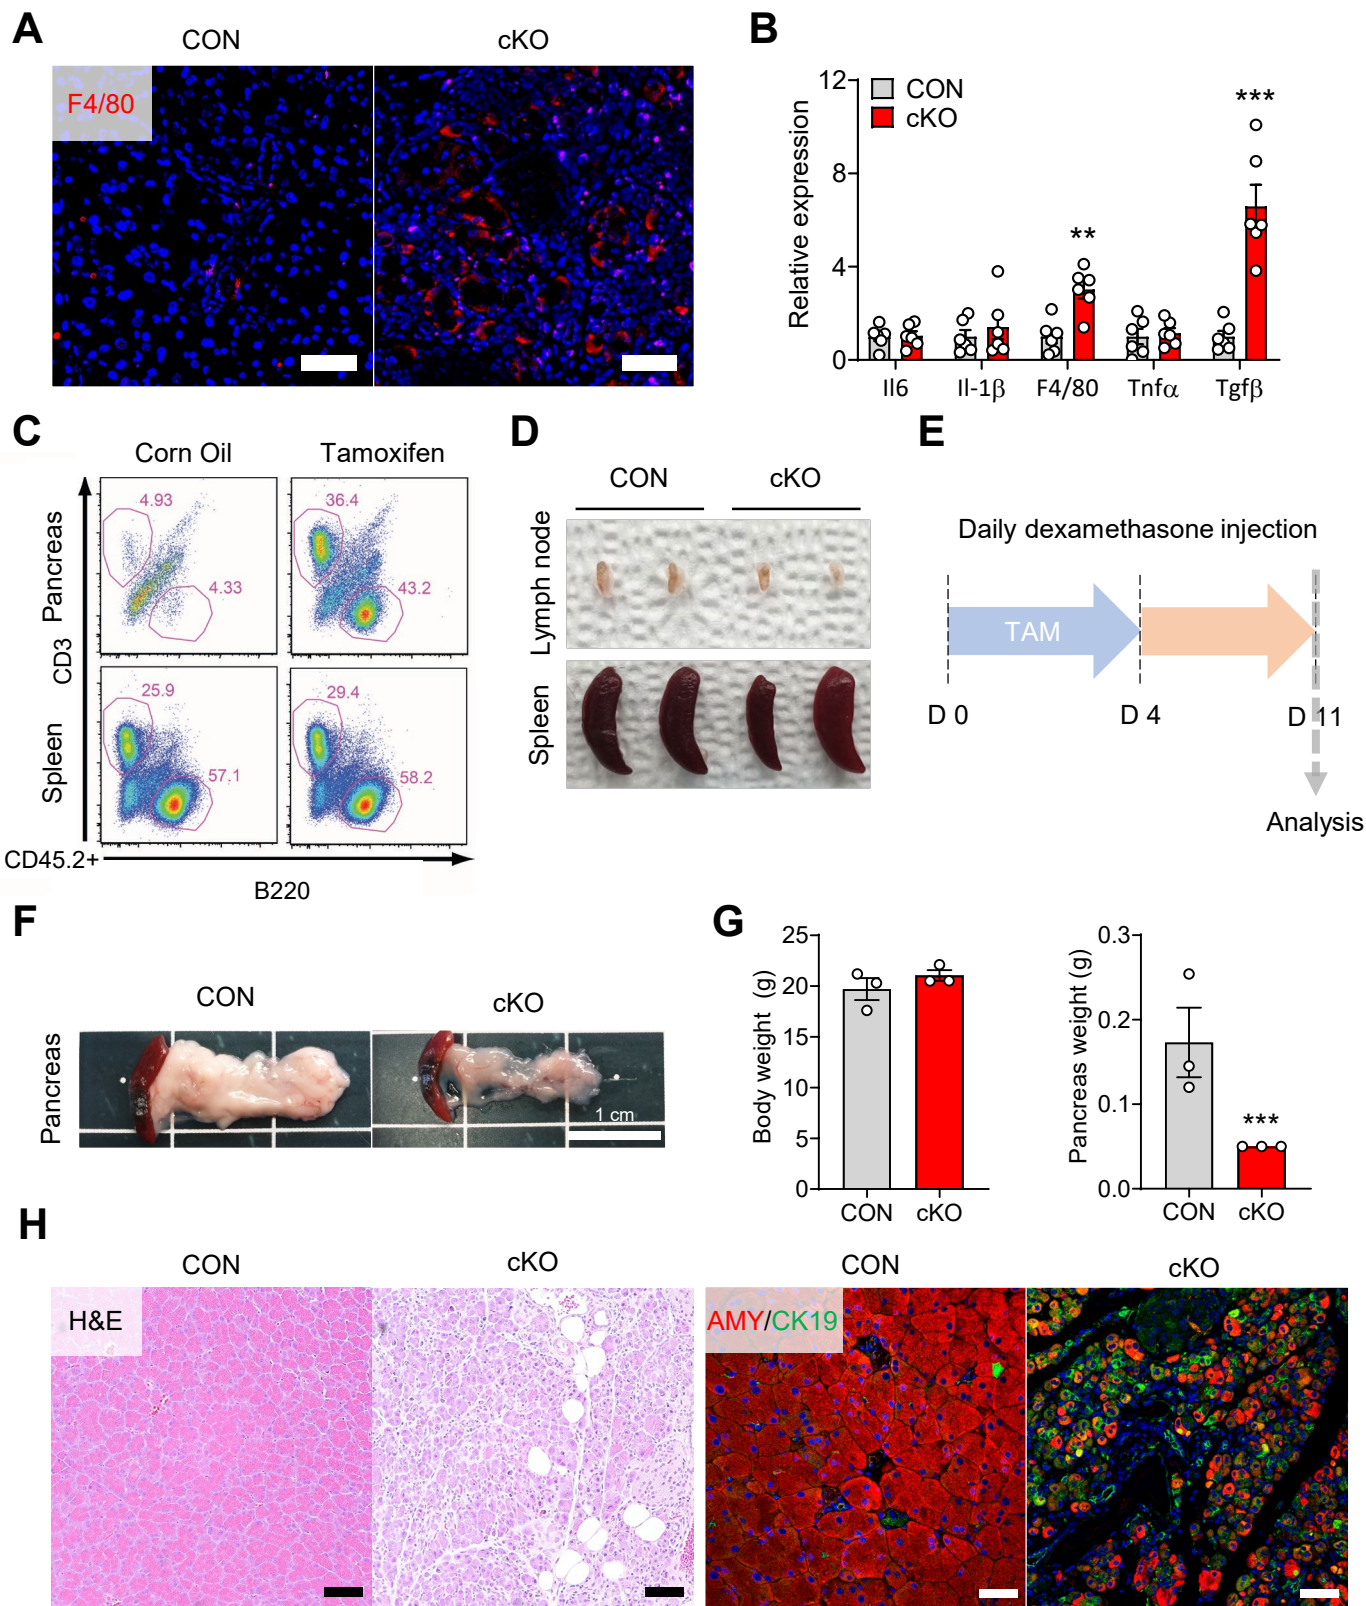

**Supplementary Figure 5. ERR $\gamma$  cKO pancreas displays local inflammation and immune cell infiltration.**

(A) Immunofluorescence images of F4/80 (red) and DAPI (blue). Scale bar, 50  $\mu$ m. (B) qPCR analysis of inflammatory cytokine gene expression from control and ERR $\gamma$  cKO pancreas at 4 d after the last TAM injection. (C) CD4 or CD8 positive cell population in pancreas and spleen. (E) Scheme of experimental design. Mice were intraperitoneally injected with dexamethasone (5 mg/kg) daily throughout the experiment (d 0 ~ d 11). TAM (75 mg/kg) was administered once daily by oral gavage for 5 consecutive days (d 0 ~ d 4) and mice were sacrificed and analyzed 7 d after final TAM treatment. (F) Gross images of pancreas tissue attached to spleen. Scale bar, 1cm. (G) body weights and pancreas weights. (H) H&E images (left panel) and immunofluorescence images (right panel) for amylase (AMY, red) and DAPI (blue) of control and ERR $\gamma$  cKO mice pancreas. CON, control; cKO, ERR $\gamma$  cKO. Scale bar, 50  $\mu$ m. All data are presented as mean  $\pm$  SEM. \*\*  $p < 0.01$ , \*\*\*  $p < 0.005$ , by student's t-test.

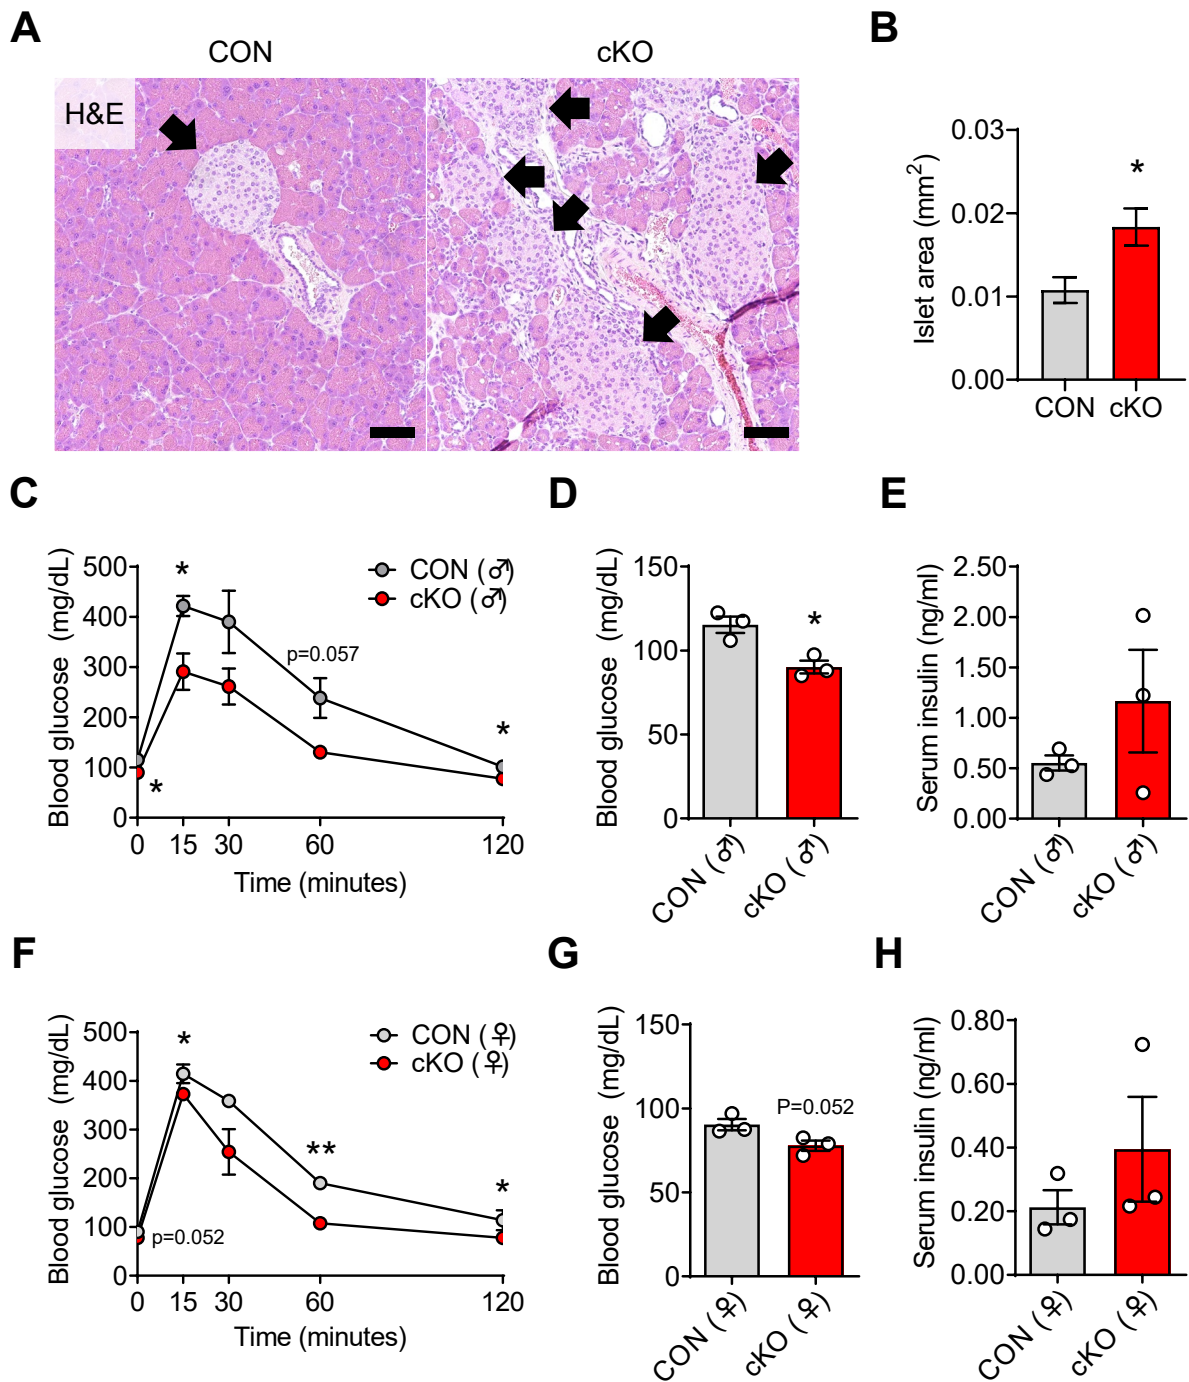

**Supplementary Figure 6. ERR $\gamma$  cKO mice exhibit islet hypertrophy and increased glucose tolerance.**

(A) H&E staining of pancreas from control and ERR $\gamma$  cKO mice at d 7 after the final TAM injection. (B) Measurement of islet area in control and ERR $\gamma$  cKO mice. (C-E) Measurement of glucose tolerance test (C), fasting blood glucose (D), and random serum insulin (E) in control and ERR $\gamma$  cKO male mice. (F-H) Measurement of glucose tolerance test (F), fasting blood glucose (G), and random serum insulin (H) in control and ERR $\gamma$  cKO female mice. CON, control; cKO, ERR $\gamma$  cKO. All data presented as mean  $\pm$  SEM. \*  $p < 0.05$ , \*\*  $p < 0.01$  by student's t-test.

**A**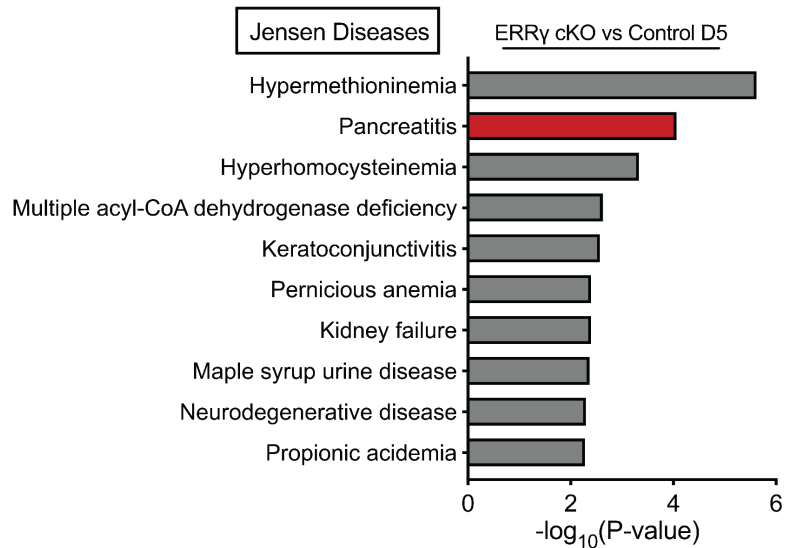**B**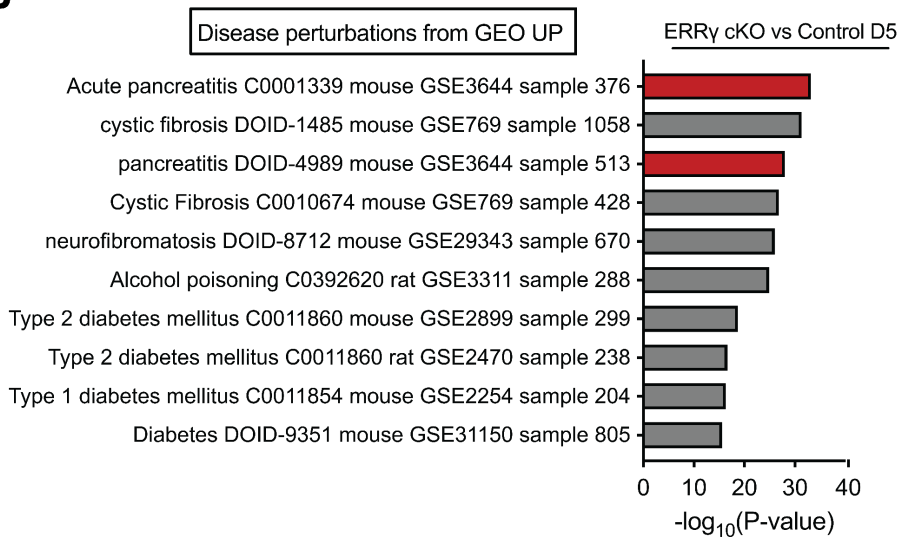

**Supplementary Figure 7. ERRy cKO pancreas RNA-seq data correspond to human pancreatitis gene expression signatures.**

(A) Enrichr analysis predicts diseases using the Jensen database. The down-regulated set from mouse RNA-seq is associated with pancreatitis. The scale was presented in  $-\log_{10}(\text{P-value})$ . (B) Enrichr analysis predicts diseases using the Disease perturbation from GEO UP. The down-regulated set from mouse RNA-seq is associated with acute pancreatitis of the previous studies. The scale was presented in  $-\log_{10}(\text{P-value})$ .

**A**

KEGG analysis : ERR $\gamma$  cKO RNA-SEQ

OXIDATIVE PHOSPHORYLATION

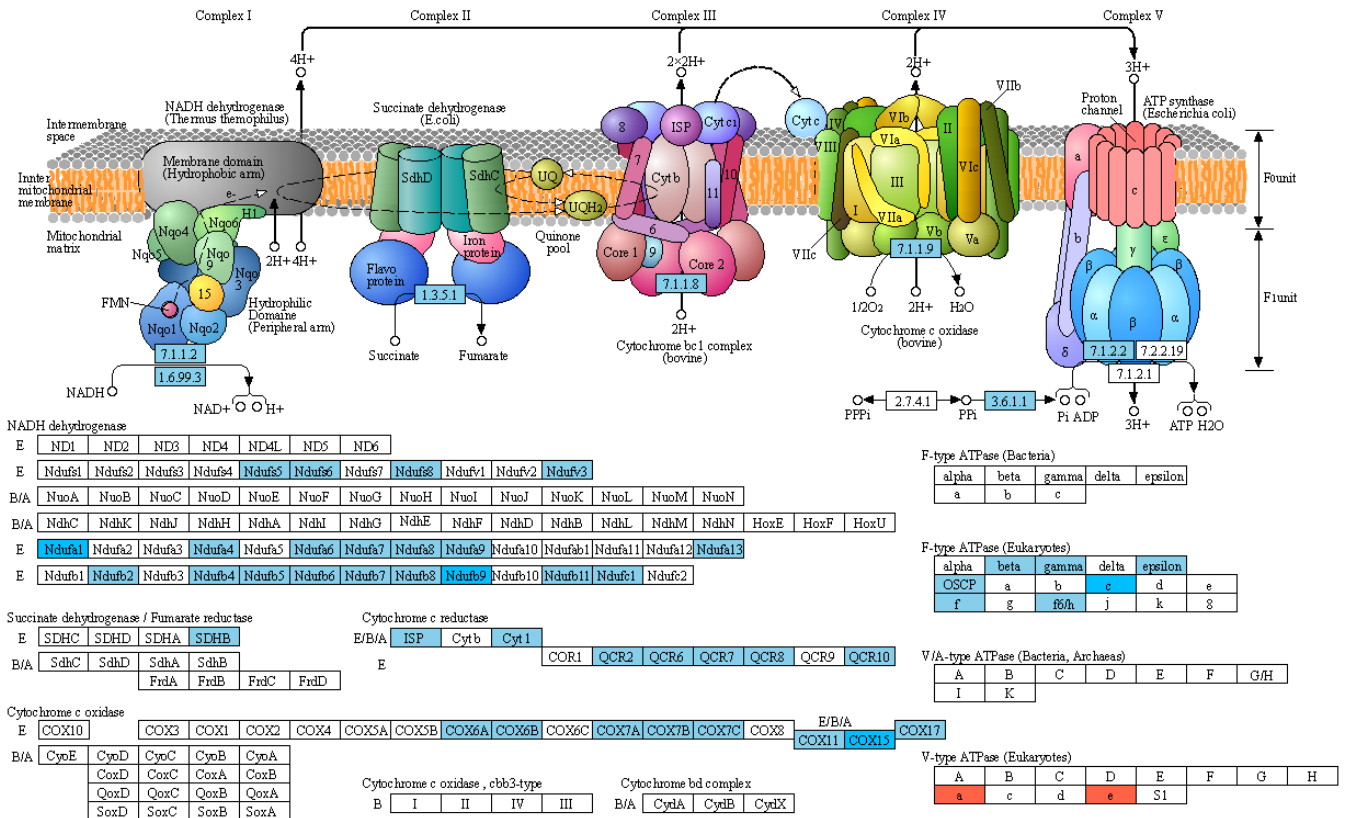

00190 1/31/20  
(c) Kanehisa Laboratories

**B**

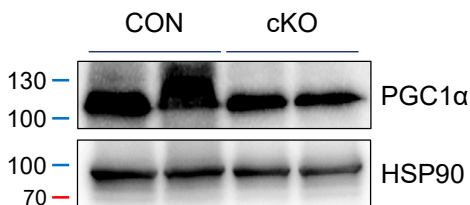

**C**

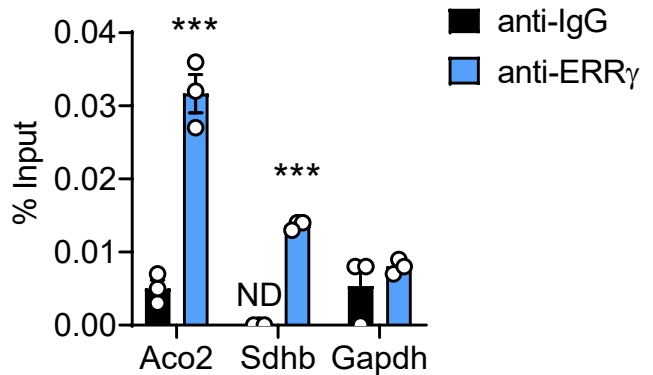

**Supplementary Figure 8. Mitochondrial OXPHOS complex gene expression is downregulated in ERR $\gamma$  cKO pancreas.**

(A) KEGG pathway analysis for OXPHOS genes in RNA-seq data from primary acini isolated from ERR $\gamma$  cKO mice 4 d after the final TAM injection. Blue-shaded boxes indicate downregulated genes, while red-shaded boxes indicate upregulated genes compared to control. (B) PGC1 $\alpha$  with internal control, HSP90 4 d after the final TAM injection. (C) ChIP-qPCR assay using mouse primary acini from male C57BL/6/J mice indicates enrichment of ERR $\gamma$  occupancy at mitochondrial genes Aco2 and Sdhb. Data presented as mean  $\pm$  SEM. \*\*\*  $p < 0.005$ , by student's t-test.



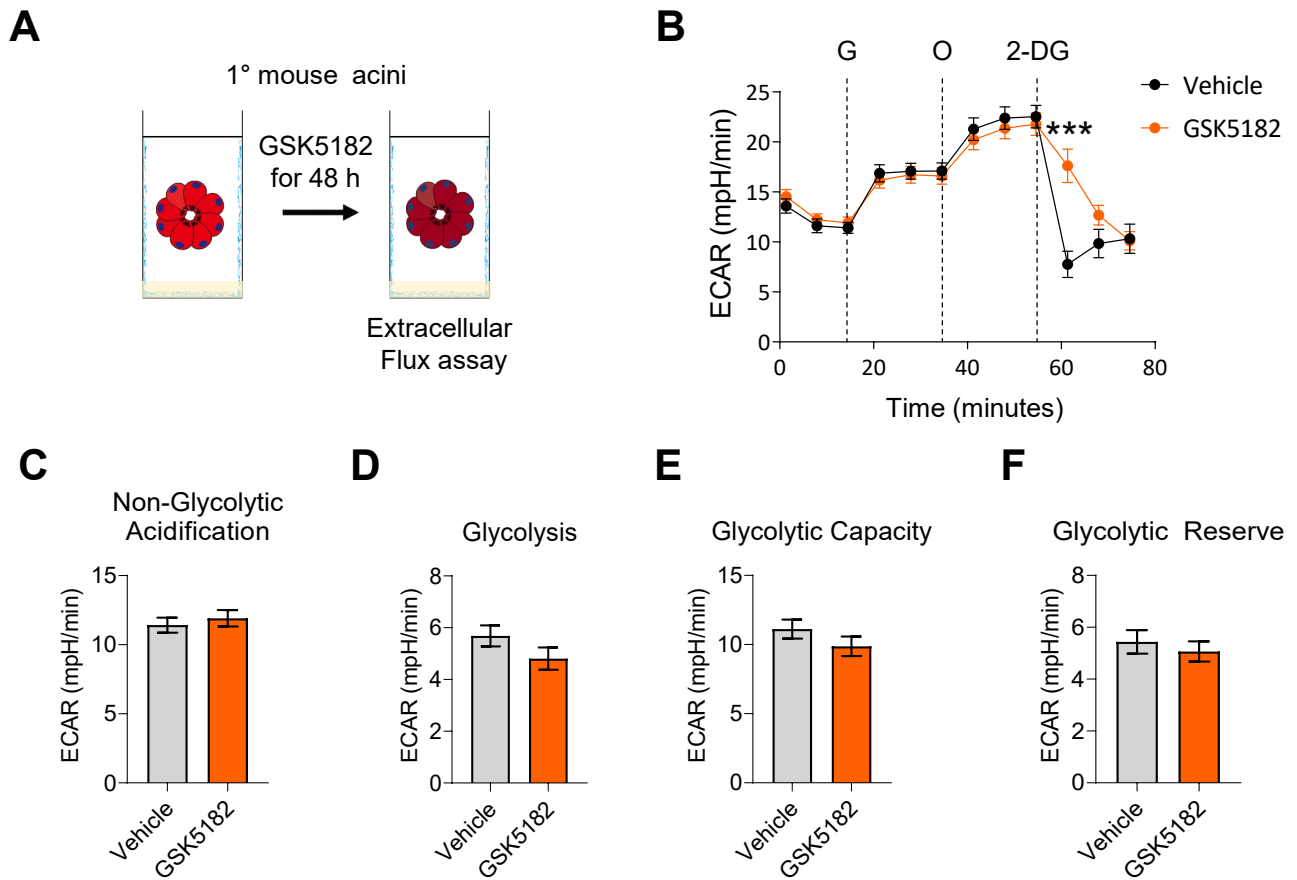

**Supplementary Figure 9. Pharmacological inhibition of ERR $\gamma$  does not affect glycolysis in primary acini.**

(A) Scheme of experiments. Primary acini from C57BL/6J mice were treated with vehicle or GSK5182 (10  $\mu$ M) for 48 h. (B-F) Extracellular flux analysis measurements for (B) extracellular acidification rate (ECAR), (C) non-glycolytic acidification, ECAR contributed by TCA cycle CO<sub>2</sub> evolution, (D) glycolysis, ECAR induced by glucose, (E) glycolytic capacity, ECAR induced by oligomycin treatment, and (F) glycolytic reserve, ECAR difference between glycolysis and glycolytic capacity. G, glucose; O, oligomycin; 2-DG, 2-deoxyglucose. n=44 per group. All data are presented as mean  $\pm$  SEM. \*\*\* p < 0.005 by two-way ANOVA.

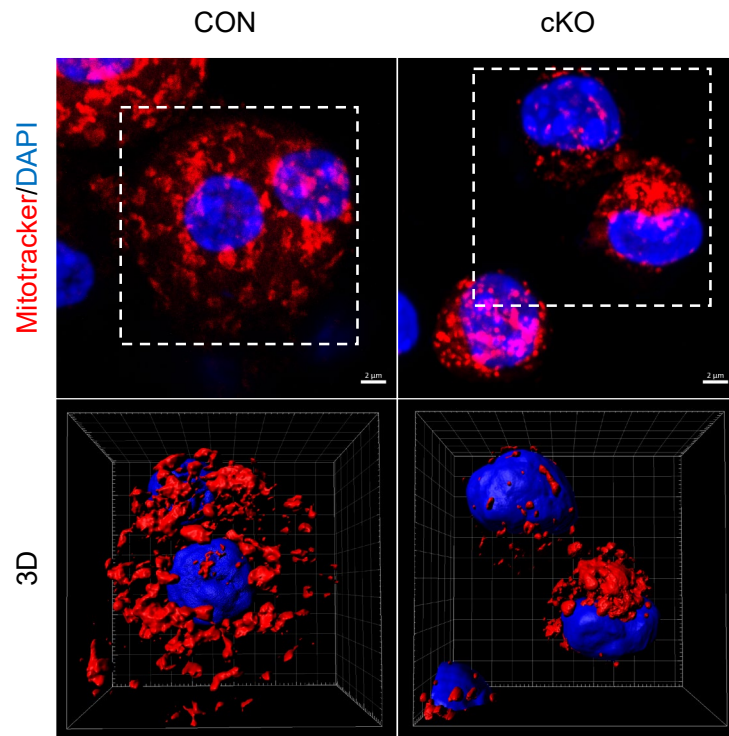

**Supplementary Figure 10. ERR $\gamma$  deletion leads to perinuclear accumulation of mitochondria.**

Primary acini stained with mitotracker (red) and DAPI (blue). 3D surface image reconstruction was generated using Imaris software. CON, control; cKO, ERR $\gamma$  cKO. Scale bar, 2  $\mu$ m.

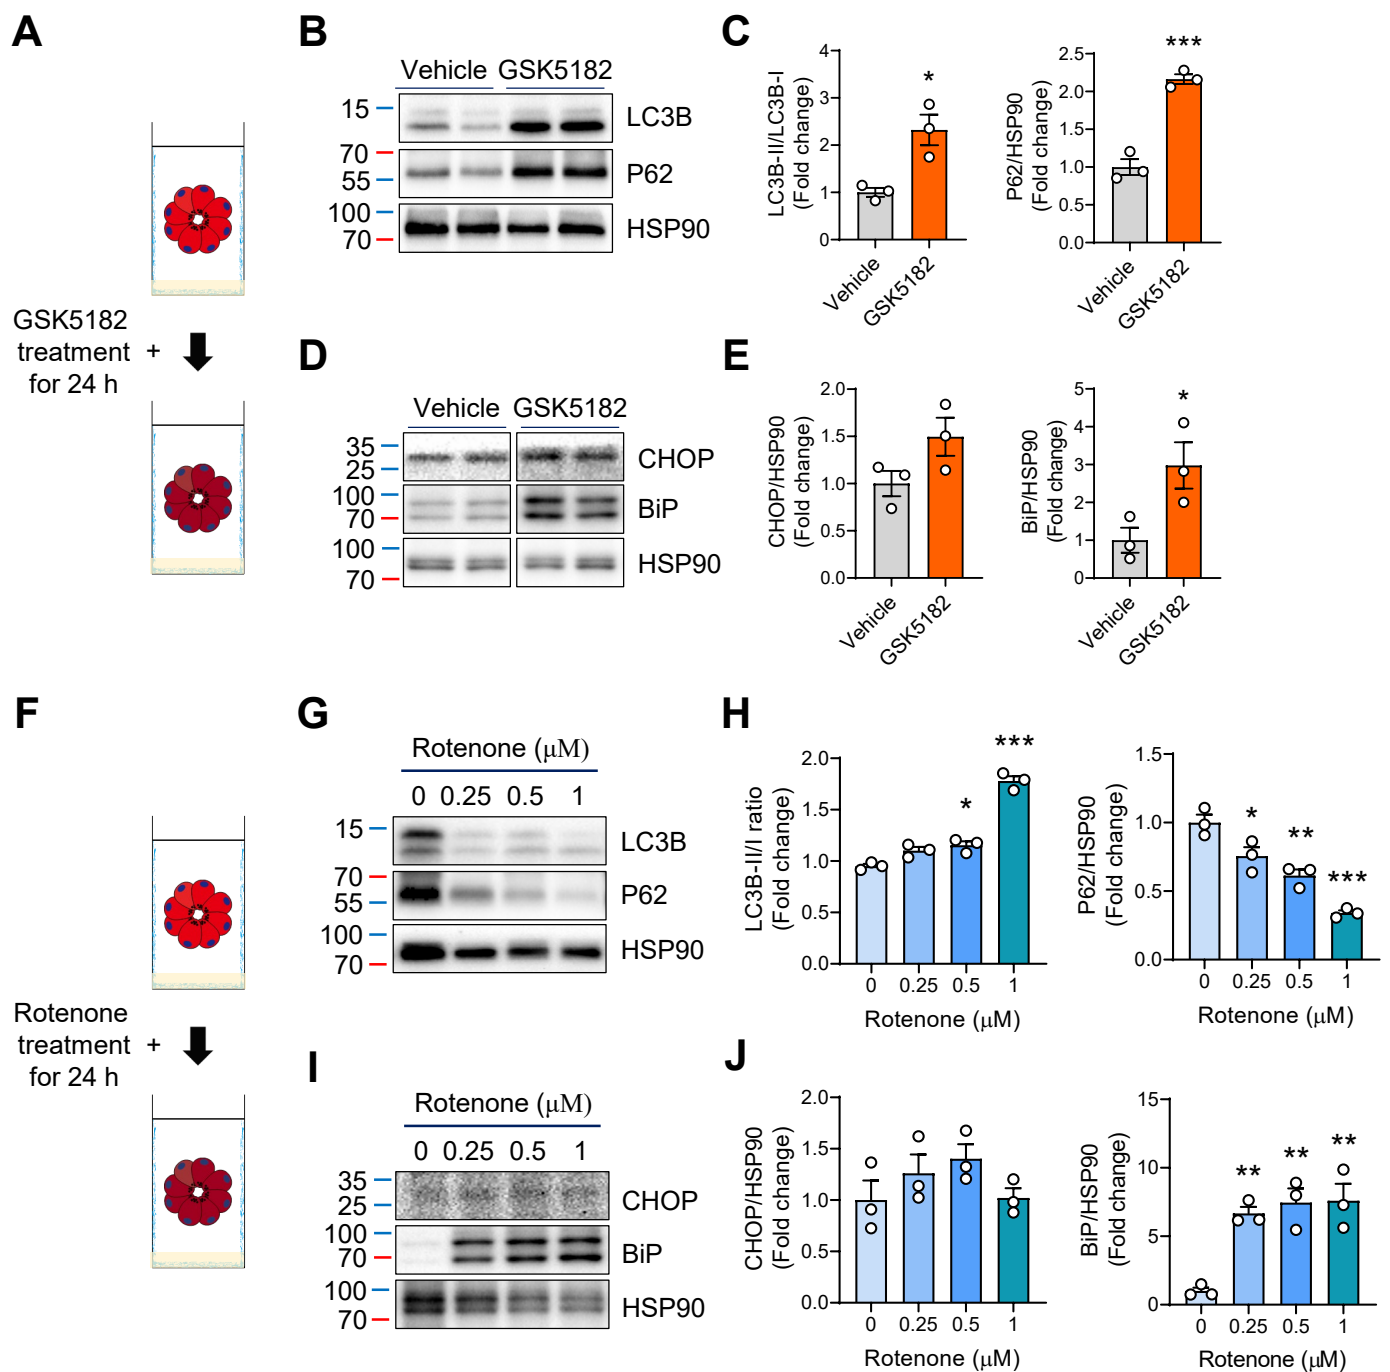

**Supplementary Figure 11. ERR $\gamma$  inverse agonist and mitochondrial complex I inhibitors induce autophagy and ER stress in primary acini.**

(A) Scheme of experimental design. Mouse primary acini were treated with GSK5182 10  $\mu\text{M}$  for 24 h. (B and D) Western blot for autophagy markers (B) and ER stress markers (D). (C and E) Quantitation of autophagy markers (C) and ER stress markers (E). Protein expression was normalized to HSP90. (F) Scheme of experimental design. Mouse primary acini were incubated with 0, 0.25, 0.5 and 1  $\mu\text{M}$  rotenone for 24 h. (G and I) Western blot for autophagy markers (G) and ER stress markers (I). (H and J) Quantitation of autophagy markers (H) and ER stress markers (J). All data are presented as mean  $\pm$  SEM. \*  $p < 0.05$ , \*\*\*  $p < 0.005$ , by student's t-test.

**A**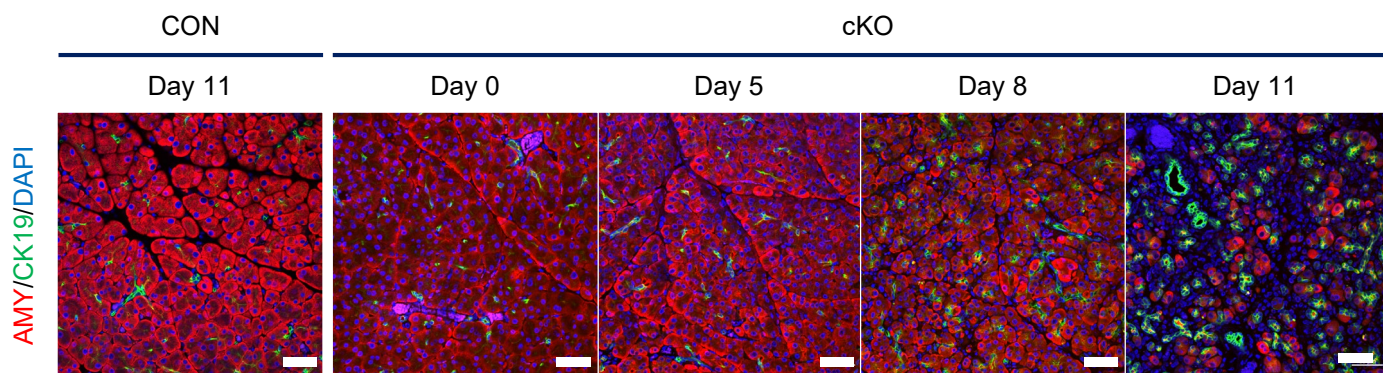**B**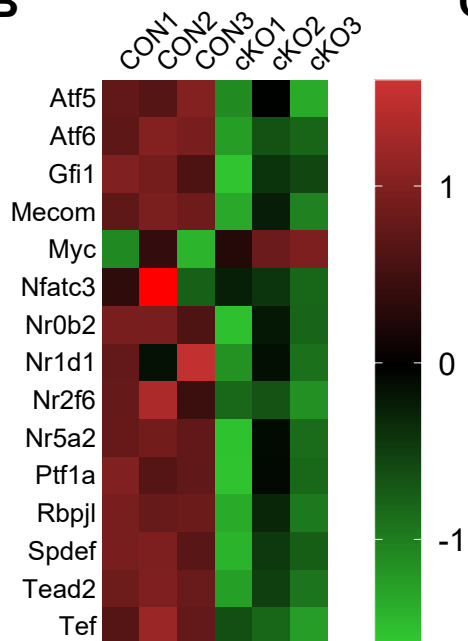**C**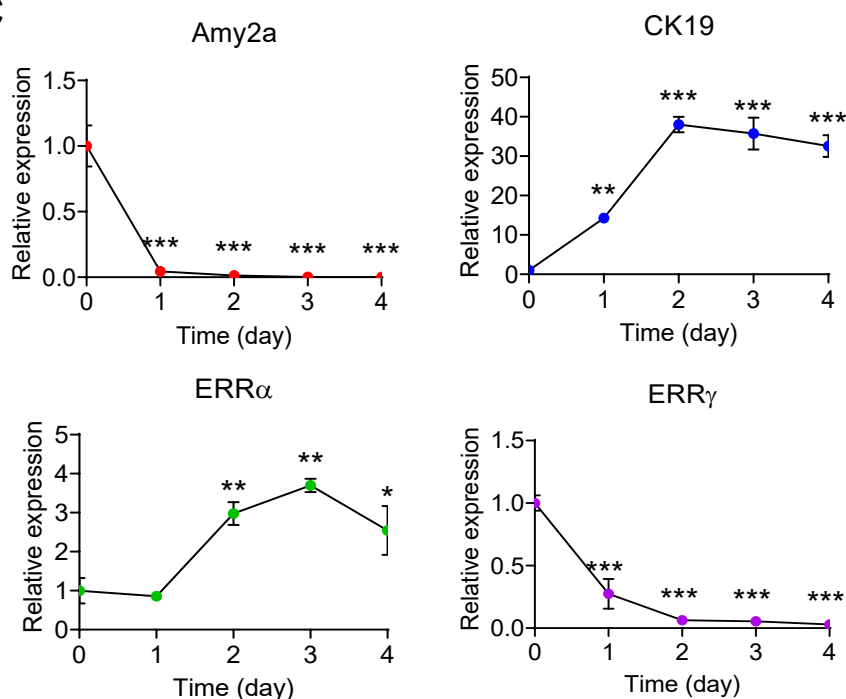

### Supplementary Figure 12. ERR $\gamma$ deletion induces acinar to ductal transdifferentiation.

(A) Images of control and ERR $\gamma$  cKO mice pancreas sections with fluorescence immunostaining for amylase (AMY, red), cytokeratin19 (CK19, green), and DAPI (blue). Scale bar, 50  $\mu$ m. Analysis performed on pancreas from indicated day after final TAM injection (B) Heatmap of genes regulating acinar cell identity from RNA-seq analysis of primary acini from control and ERR $\gamma$  KO mice 4 d after the final TAM injection. (C) Gene expression analysis of primary acini cultured in matrigel dome and undergoing acinar to ductal transdifferentiation. CON, control; cKO, ERR $\gamma$  cKO. All data are presented as mean  $\pm$  SEM. \*  $p < 0.05$ , \*\*\*  $p < 0.005$ , by student's t-test.

**A**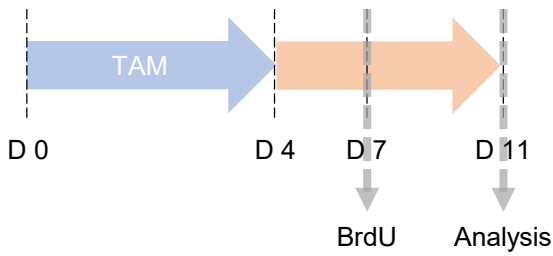**B**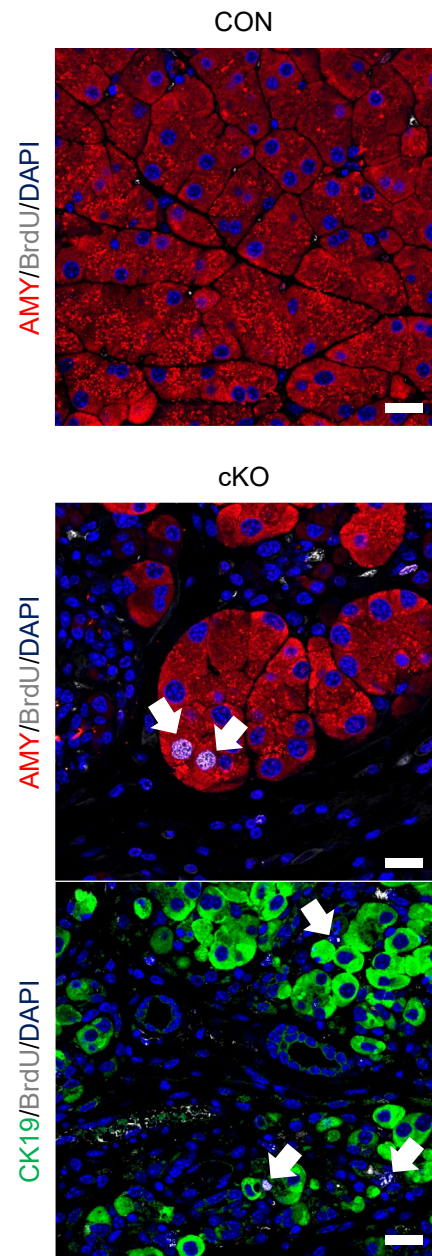

**Supplementary Figure 13. Ductal cell proliferation is not a major contributor to the appearance of duct-like cells in  $ERR\gamma$  cKO pancreas.**

(A) Scheme of experimental design for BrdU incorporation in control and  $ERR\gamma$  cKO mice. (B) Immunofluorescence staining of control and  $ERR\gamma$  cKO mice pancreas sections for amylase (AMY, red), BrdU (white) and DAPI (blue). CON, control; cKO,  $ERR\gamma$  cKO. Scale bar, 50  $\mu$ m.

**A**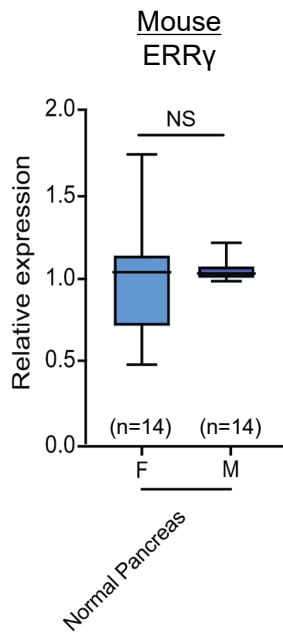**B**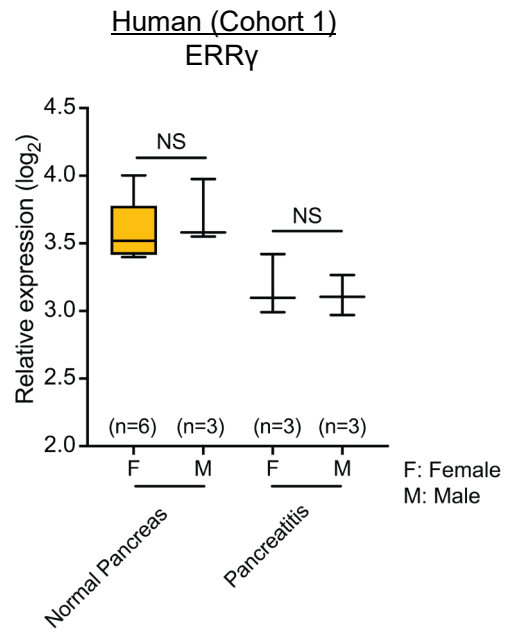

**Supplementary Figure 14. ERR $\gamma$  expression levels in the pancreas of male and female mice and human.**

(A) ERR $\gamma$  expression in normal pancreas from C57BL/6 mice (female, n = 14; male, n = 14). (B) ERR $\gamma$  expression in normal pancreas from normal (female, n = 6; male, n = 3) and pancreatitis (female, n = 3; male, n = 3) from human cohort 1 (GSE143754). The microarray data was extracted and normalized. Expression level shown as log<sub>2</sub> scale.

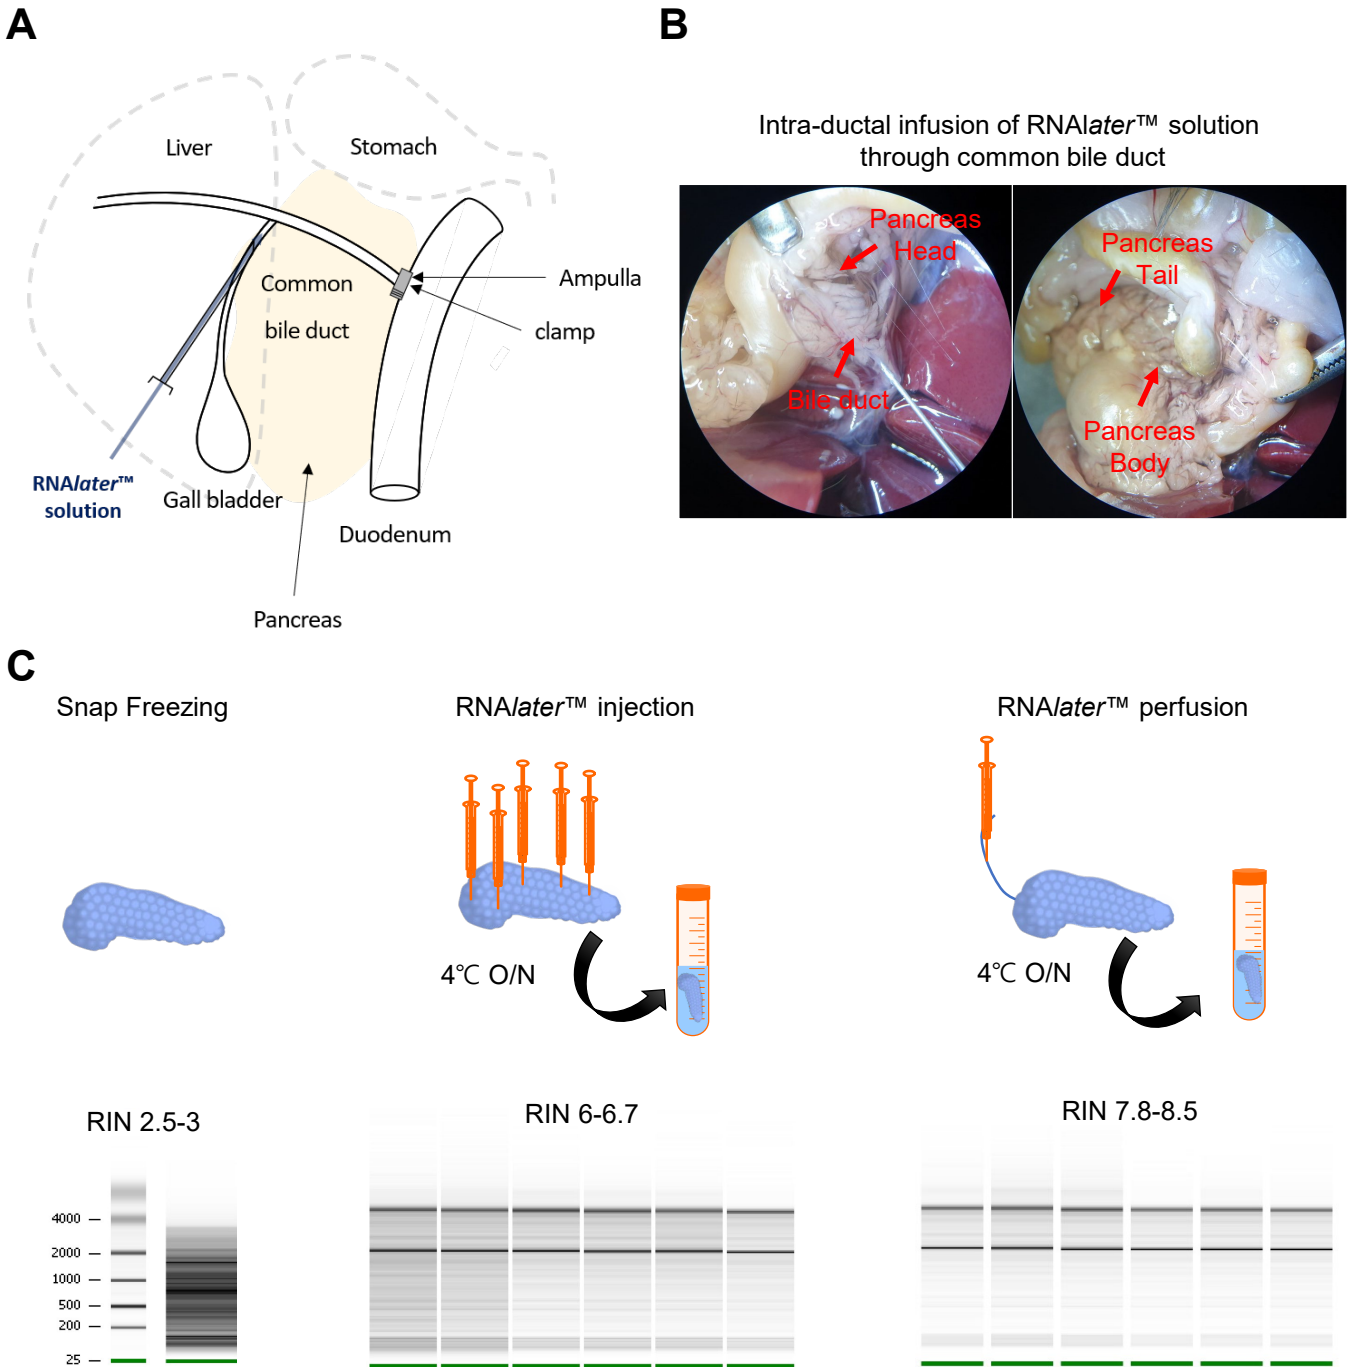

**Supplementary Figure 15. High-quality RNA extraction procedure from pancreas.**

(A) Illustration of intraductal infusion of RNAlater™ solution into pancreas after ligation of common bile duct. (B) Images of intraductal infusion of RNAlater™ solution into pancreas after ligation of common bile duct. (C) RNA integrity number (RIN) of RNA isolated from pancreas through three different methods

| Metabolite                 | Concentration (ng/mg) |                | Normalized value <sup>a</sup> | Wilcoxon rank sum test |
|----------------------------|-----------------------|----------------|-------------------------------|------------------------|
|                            | CON                   | cKO            |                               |                        |
| Pyruvic acid               | 4.92 ± 1.10           | 5.13 ± 1.63    | 1.06                          | 0.792                  |
| Lactic acid                | 385.00 ± 37.99        | 509.82 ± 68.40 | 1.32                          | 0.017                  |
| Citric acid                | 35.15 ± 26.54         | 89.90 ± 22.54  | 3.82                          | 0.004                  |
| cis-Aconitic acid          | 1.64 ± 0.99           | 3.50 ± 0.98    | 2.70                          | 0.004                  |
| Isocitric acid             | 0.09 ± 0.08           | 0.26 ± 0.05    | 4.20                          | 0.004                  |
| α-Ketoglutaric acid        | 4.42 ± 1.82           | 1.88 ± 0.58    | 0.40                          | 0.009                  |
| 2-Hydroxyglutaric acid     | 8.75 ± 1.23           | 7.76 ± 0.59    | 0.87                          | 0.247                  |
| Succinic acid              | 7.24 ± 1.85           | 2.98 ± 1.03    | 0.39                          | 0.004                  |
| Fumaric acid               | 31.08 ± 4.37          | 22.53 ± 3.33   | 0.70                          | 0.004                  |
| Malic acid                 | 79.36 ± 14.31         | 94.80 ± 12.36  | 1.23                          | 0.126                  |
| Oxaloacetic acid           | 0.66 ± 0.03           | 0.63 ± 0.01    | 0.95                          | 0.247                  |
| Glycolic acid              | 79.96 ± 11.28         | 111.25 ± 25.01 | 1.38                          | 0.030                  |
| Acetoacetic acid           | 33.60 ± 42.19         | 128.95 ± 48.59 | 7.72                          | 0.004                  |
| 3-Hydroxybutyric acid      | 61.73 ± 18.07         | 69.61 ± 15.12  | 1.27                          | 0.247                  |
| 3-Hydroxyisobutyric acid   | 3.39 ± 1.49           | 3.73 ± 0.94    | 1.30                          | 0.126                  |
| 2-Hydroxybutyric acid      | 1.26 ± 0.75           | 2.11 ± 0.53    | 2.21                          | 0.004                  |
| 3-Hydroxypropionic acid    | 3.73 ± 0.33           | 5.35 ± 0.49    | 1.47                          | 0.004                  |
| 4-Hydroxyphenylacetic acid | 0.35 ± 0.01           | 0.36 ± 0.02    | 1.03                          | 0.329                  |

<sup>a</sup> Values normalized to the corresponding control mean values

### Supplementary Table 1. Levels of organic acids in pancreas tissues from control and ERRγ cKO mice.

Mice were intraperitoneally injected with tamoxifen (75 mg/kg) once daily for 5 consecutive days and sacrificed at day 4 after the final tamoxifen injection. Targeted metabolomics of organic acids from pancreas tissues were performed with MO/TBDMS derivatives by GC-MS/MS. CON, control (n = 5, male); cKO, ERRγ cKO (n = 5, male). Metabolite concentrations expressed as mean ± SD



| Chr.     | Position (GRCh37) | rs ID       | Risk Allele | Other Allele | MAF     | OR   | P value  |
|----------|-------------------|-------------|-------------|--------------|---------|------|----------|
| A. UKBB  |                   |             |             |              |         |      |          |
| 1        | 216756821         | rs17669622  | G           | A            | 0.1343  | 0.82 | 0.00093  |
| 1        | 216819427         | rs12023399  | C           | G            | 0.1517  | 0.81 | 0.00063  |
| 1        | 217303670         | rs72743335  | G           | A            | 0.07    | 1.35 | 0.00079  |
| 1        | 217312568         | rs201118685 | CC          | C            | 0.00007 | 0.82 | 9.80E-05 |
| 1        | 217324932         | rs1502358   | A           | G            | 0.3142  | 0.82 | 0.00016  |
| 1        | 217318595         | rs12119765* | T           | C            | 0.4851  | 0.84 | 0.00040  |
| B. NAPS2 |                   |             |             |              |         |      |          |
| 1        | 216527641         | rs55720440  | A           | G            | 0.0196  | 0.33 | 0.0059   |
| 1        | 216731498         | rs17668665  | A           | G            | 0.1633  | 0.71 | 0.0012   |
| 1        | 216989899         | rs74899022  | A           | G            | 0.04613 | 1.93 | 0.0085   |
| 1        | 216998613         | rs11117688  | T           | C            | 0.02566 | 0.54 | 0.0021   |
| 1        | 217014281         | rs61817890  | C           | T            | 0.03055 | 0.55 | 0.0055   |
| 1        | 217090326         | rs80280016  | G           | A            | 0.04277 | 1.54 | 0.0056   |
| 1        | 217092655         | rs10779284  | C           | T            | 0.4685  | 0.81 | 0.0066   |

**Supplementary Table 2. Genetic variants associated with regulatory elements within the *ESRRG* gene locus with an effect on chronic pancreatitis.**

rs12119765\* is the second highest single nucleotide variant (SNV) in the haplotype defined by rs76622060, since this SNV is reported to have a very low mutant allele fraction (MAF) in ALFA, but similar to rs12119765 in HaploReg. Chr., chromosome; Position on the chromosome; rsID, dbSNP reference number; MAF, minor allele frequency using the Allele Frequency Aggregator (ALFA) project allele frequency for Europeans; OR, odds ratio.

| Chr.    | Position (GRCh37) | rs ID       | Risk Allele | Other Allele | MAF (ALFA EU) | OR   | P value |
|---------|-------------------|-------------|-------------|--------------|---------------|------|---------|
| UKBB AP |                   |             |             |              |               |      |         |
| 1       | 216883643         | rs2820879   | C           | T            | 0.1532        | 1.12 | 0.0034  |
| 1       | 216992598         | rs115725121 | G           | A            | 0.00678       | 1.33 | 0.0034  |
| 1       | 217059291         | rs17044247  | C           | T            | 0.1275        | 1.13 | 0.0027  |
| 1       | 217068430         | rs76437375  | T           | C            | 0.01099       | 1.39 | 0.0016  |
| 1       | 217075587         | rs61818569  | T           | G            | 0.01274       | 1.34 | 0.0039  |
| 1       | 217079179         | rs61818570  | G           | A            | 0.01092       | 1.40 | 0.0016  |
| 1       | 217083207         | rs17684269  | T           | C            | 0.1369        | 0.88 | 0.0074  |
| 1       | 217345024         | rs116725108 | G           | T            | 0.01183       | 0.64 | 0.0078  |

**Supplementary Table 3. Genetic variants associated with regulatory elements within the *ESRRG* gene locus with an effect on Acute pancreatitis.**

The lead SNV was rs61818570 (OR = 1.40; p = 0.0016), which is linked to 5 intronic SNVs that alter gene promotor histone marks, enhancer histone marks, DNase susceptibility and multiple nucleotide binding site motifs based on HaploReg v4.1. Thus, there is a signal for an effect of alterations in *ESRRG* gene regulation in AP, but no SNV had strong statistical evidence (e.g. p<0.01, but not p<0.001).
